# Supplementary material
Source: Springer Nature journal article supplement (https://www.springermedizin.de/resource/supplementary/12939_2009_171_MOESM3_ESM.pdf/9551642)

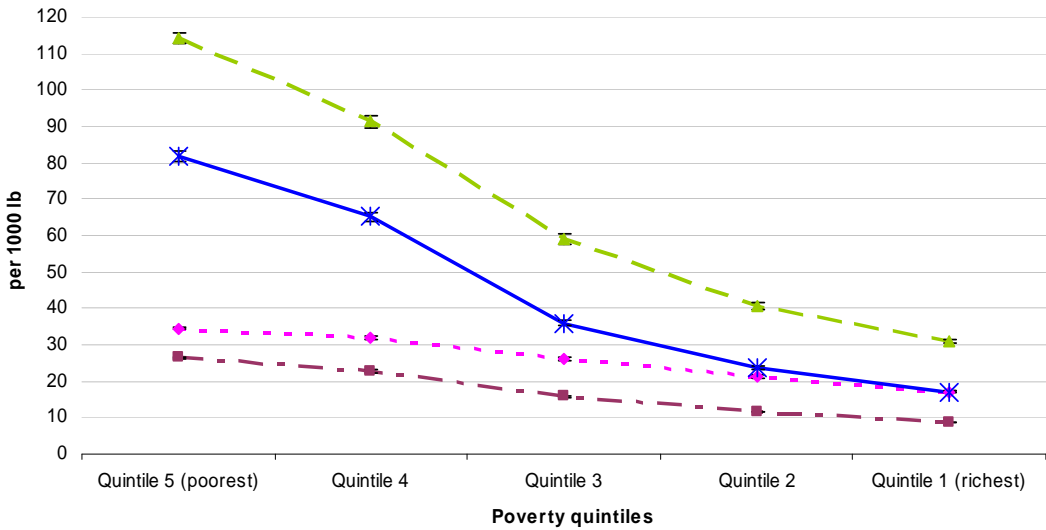

-♦- NNM 1991    -■- NNM 2000    -▲- U5MR 1991    -\* - U5MR 2000

Supplement: MOESM3 [file 9551642]
